# Supplementary material for: CAMTA 1 regulates drought responses in Arabidopsis thaliana
Source: PubMed Central journal article supplement (PMC3621073; doi:10.1186/1471-2164-14-216), 2013-04-02

A

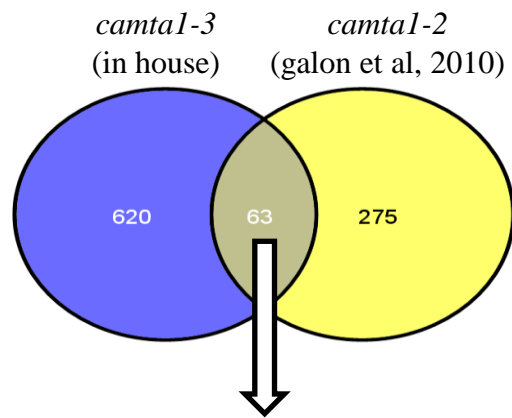

| Probe Set ID | Locus Identifier | Gene Title                         | FC ( <i>camta1-3</i> ) | FC ( <i>camta1-2</i> ) |
|--------------|------------------|------------------------------------|------------------------|------------------------|
| 262212_at    | AT1G74890        | ARR15 (auxin response regulator15) | 5.376499               | 2.723093               |
| 252415_at    | AT3G47340        | ASN1 (dark inducible 6)            | 4.958831               | 2.22684                |
| 247949_at    | AT5G57220        | cyp81f2 (cytochrome p450)          | 3.899617               | 9.57983                |
| 246108_at    | AT5G28630        | glycine-rich protein               | 2.751084               | 4.453687               |
| 259560_at    | AT1G21270        | WAK2 (wall-associated kinase)      | 2.639015               | 2.514027               |
| 246238_at    | AT4G36670        | mannitol transporter               | 2.276263               | 2.150989               |
| 250666_at    | AT5G07100        | WRKY26                             | 2.271009               | 2.006943               |

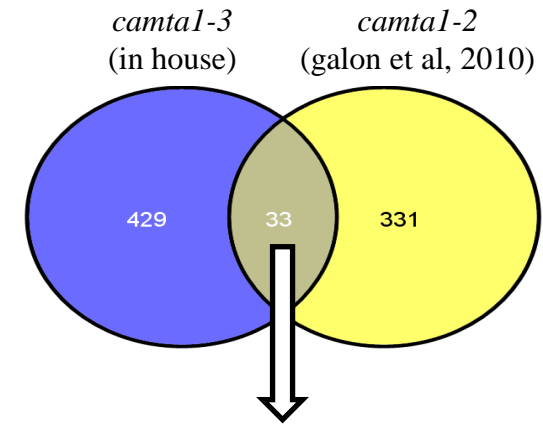

| Probe Set ID | Locus Identifier | Gene Title                                         | FC ( <i>camta1-3</i> ) | FC ( <i>camta1-2</i> ) |
|--------------|------------------|----------------------------------------------------|------------------------|------------------------|
| 250207_at    | AT5G13930        | chalcone synthase                                  | -2.82843               | -2.36199               |
| 264931_at    | AT1G60590        | polygalacturonase                                  | -2.75745               | -2.46229               |
| 260955_at    | AT1G06000        | UDP-glucuronosyl                                   | -2.55502               | -2.77022               |
| 258321_at    | AT3G22840        | early light-inducible protein                      | -2.27626               | -2.49666               |
| 265665_at    | AT2G27420        | cysteine proteinase                                | -2.04202               | -6.56593               |
| 262382_at    | AT1G72920        | disease resistance protein                         | -2.65737               | -4.16986               |
| 247543_at    | AT5G61600        | ethylene-responsive element-binding family protein | -2.56093               | -2.51572               |

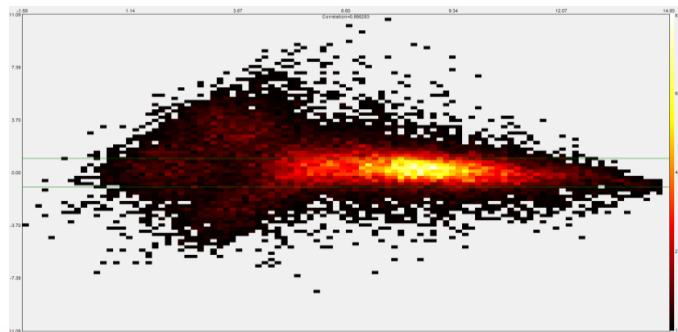

r = 0.86

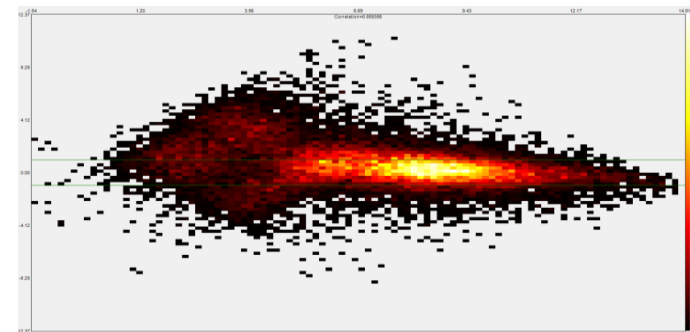

r = 0.85

B

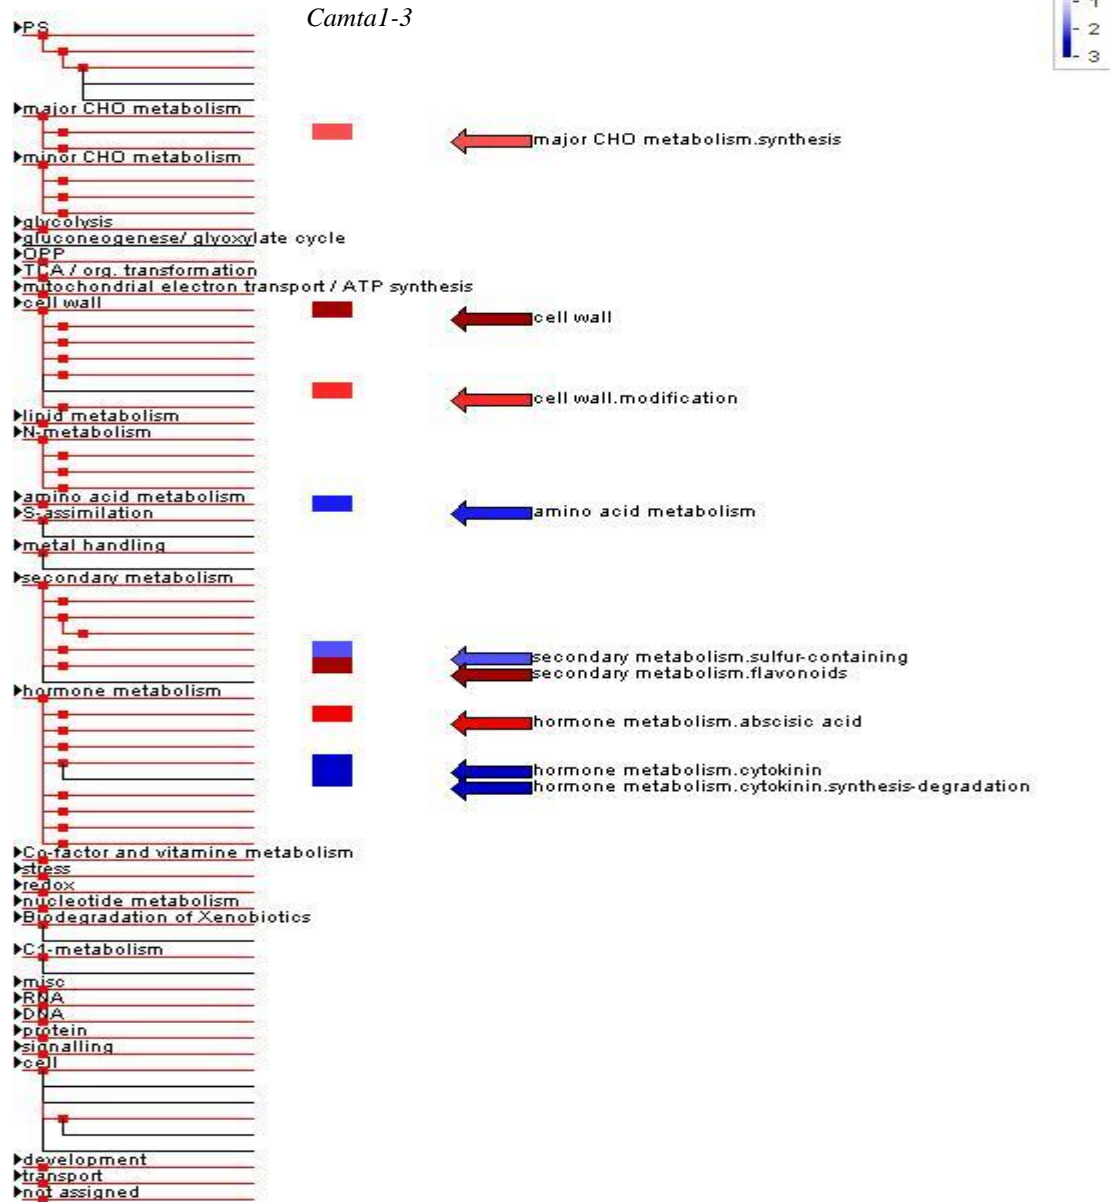

Supplement: 1471-2164-14-216-S17.pdf [file 1471-2164-14-216-S17.pdf]
