# Supplementary material for: CAMTA 1 regulates drought responses in Arabidopsis thaliana
Source: PubMed Central journal article supplement (PMC3621073; doi:10.1186/1471-2164-14-216), 2013-04-02
Supplement: 1471-2164-14-216-S1.pdf [file 1471-2164-14-216-S1.pdf]

| Gene name | Locus     | Germplams                | Genotype   | background | Polymorphism site |
|-----------|-----------|--------------------------|------------|------------|-------------------|
| CAMTA 1   | AT5G09410 | SALK_108806, SALK_008187 | Homozygous | Col-0      | Exon              |
| CAMTA 2   | AT5G64220 | SALK_014733              | Homozygous | Col-0      | Promoter          |
| CAMTA 3   | AT2G22300 | SALK_001152              | Homozygous | Col-0      | Exon              |
| CAMTA 4   | AT1G67310 | SALK_087870              | Homozygous | Col-0      | Exon              |
| CAMTA 5   | AT4G16150 | SALK_120516              | Homozygous | Col-0      | Promoter          |
| CAMTA 6   | AT3G16940 | SALK_078900              | Homozygous | Col-0      | Exon              |

Additional file 1
