# Supplementary material for: CAMTA 1 regulates drought responses in Arabidopsis thaliana
Source: PubMed Central journal article supplement (PMC3621073; doi:10.1186/1471-2164-14-216), 2013-04-02
Supplement: 1471-2164-14-216-S2.pdf [file 1471-2164-14-216-S2.pdf]

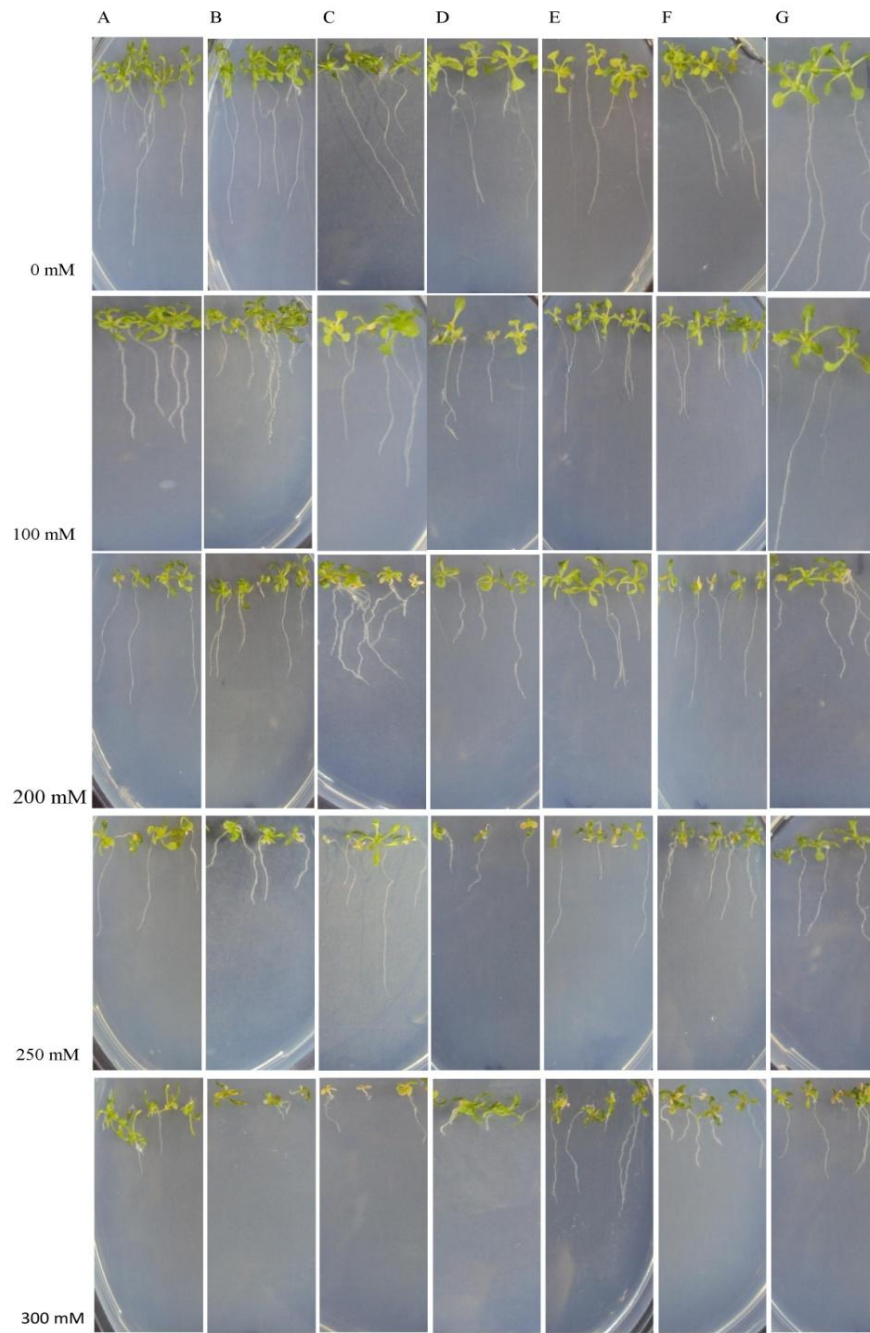

Additional file 2
