# Supplementary material for: CAMTA 1 regulates drought responses in Arabidopsis thaliana
Source: PubMed Central journal article supplement (PMC3621073; doi:10.1186/1471-2164-14-216), 2013-04-02

| Parameters               | Unit            | Col-0        | <i>camta1-2</i> | <i>camta1-3</i> |
|--------------------------|-----------------|--------------|-----------------|-----------------|
| Number of rosette leaves | Count           | 15.22 ± 6.47 | 11.66 ± 4.63    | 10.01 ± 4.89    |
| Leaf area                | mm <sup>2</sup> | 29.06 ± 1.76 | 23.14 ± 2.93    | 24.27 ± 2.08    |
| Rosette radius           | mm              | 27.85 ± 2.19 | 16.1 ± 2.56     | 18.71 ± 4.19    |
| Primary root length      | mm              | 61.55 ± 5.69 | 38.28 ± 4.11    | 43.39 ± 2.70    |

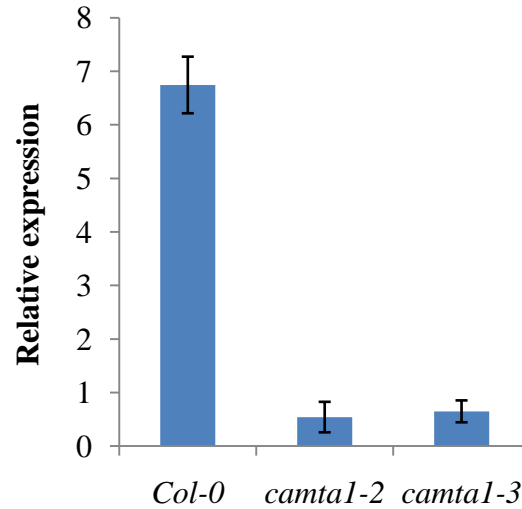

Supplement: 1471-2164-14-216-S3.pdf [file 1471-2164-14-216-S3.pdf]
