# Supplementary material for: CAMTA 1 regulates drought responses in Arabidopsis thaliana
Source: PubMed Central journal article supplement (PMC3621073; doi:10.1186/1471-2164-14-216), 2013-04-02

A

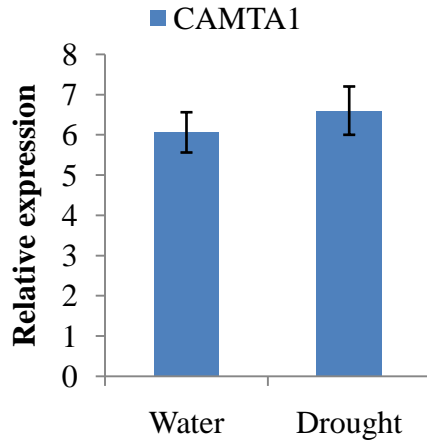

B

| Condition                  | Up regulated | Down regulated |
|----------------------------|--------------|----------------|
| WT-C/M1-C<br>(Leaf tissue) | 209          | 169            |
| WT-C/M1-C<br>(Root tissue) | 670          | 635            |

gene count of differentially expressed genes  
(P value  $\leq 0.05$  and FC  $\geq 2$ )

C

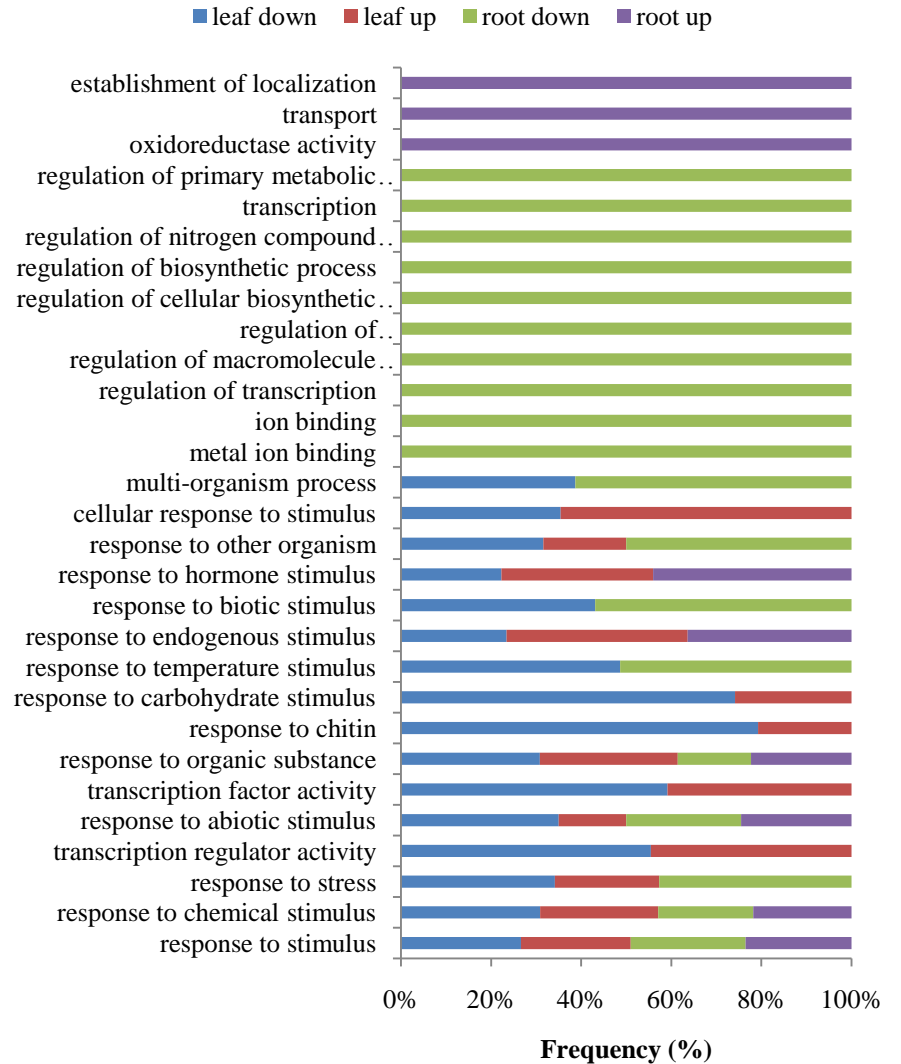

Supplement: 1471-2164-14-216-S10.pdf [file 1471-2164-14-216-S10.pdf]
