# Supplementary material for: CAMTA 1 regulates drought responses in Arabidopsis thaliana
Source: PubMed Central journal article supplement (PMC3621073; doi:10.1186/1471-2164-14-216), 2013-04-02
Supplement: 1471-2164-14-216-S18.pdf [file 1471-2164-14-216-S18.pdf]

| Gene name                   | Forward Primer (5'-3')   | Reverse Primer (5'-3') |
|-----------------------------|--------------------------|------------------------|
| glutathione S-transferase   | GCGAGATACTACGCTACCAAGTTC | TCTAGAGACTTGCCCAAAGGTT |
| anthocyanidin synthase      | AGCCGTTGCCTGATATGGT      | GCAAATGTCCTTGGAGGAAA   |
| lipid transfer protein      | GCACAGTGGCAAGTAGCTTGA    | CACCACCCACCCTTTGA      |
| oxidoreductase              | GGAGGATCGGGAGATTGC       | AGCCGCGTTGAGGTCAGA     |
| LEA protein                 | ATGCCGCCTAGCCTTATCA      | CGCCTCGTTCCGAGTGA      |
| dihydroflavonol 4-reductase | TCGGTCCATTCATCACAACGT    | ATAGGAGAGAGCGCGGTGATA  |
| ATCAMTA1                    | CCGGAAACAATACCGAACAG     | TCCAACGCAAATGATTTTCTC  |
| Ubiquitin                   | GAAGCAGCTCGAGGATGGAA     | CCACGGAGACGGAGGACA A   |

Additional file 18
